# Supplementary material for: Biomine: predicting links between biological entities using network models of heterogeneous databases
Source: Springer Nature journal article supplement (doi:10.1186/1471-2105-13-119), 2012-06-06

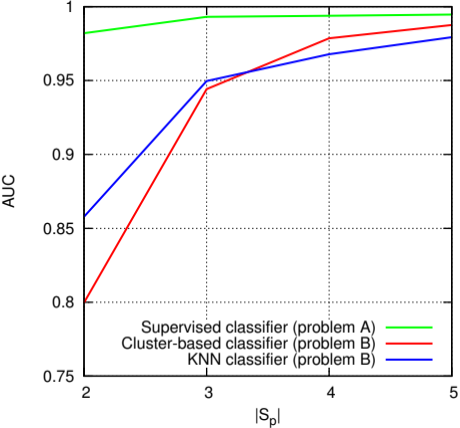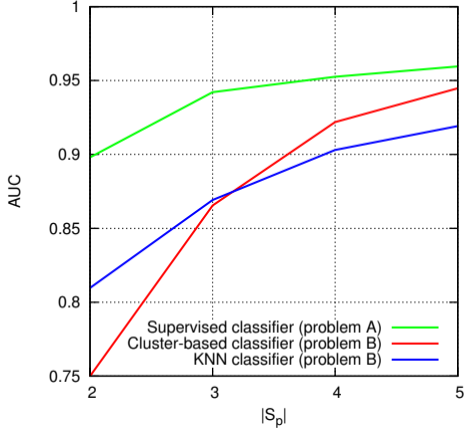

Supplement: 12859_2011_5450_MOESM11_ESM.pdf [file 12859_2011_5450_MOESM11_ESM.pdf]
